# Supplementary material for: Orthogonal Experimental Study on the Factors Affecting the Mechanical Properties of Alkali-Activated Slag Materials
Source: MDPI journal article supplement (doi:10.3390/ma15248795), 2022-12-09
Supplement: s1 [file s1]

## Supplementary Information

### 1. The original data of uniaxial compression test

In each group of experiments shown in Table 3, we prepared 8 samples. Table S1 records the original data of uniaxial compression specimens. Fig. S1 is the stress-strain curve of two samples in some group.

**Table S1.** The original data of uniaxial compression test.

| Mix No.     | Compressive Strength of 7 Days |       |       |               |                | Compressive Strength of 28 Days |       |       |               |                |
|-------------|--------------------------------|-------|-------|---------------|----------------|---------------------------------|-------|-------|---------------|----------------|
|             | SM -A                          | SM-B  | SM-C  | Average Value | Standard Error | SM-A                            | SM-B  | SM-C  | Average Value | Standard Error |
| 1-A1B1C1D1  | 56.85                          | 57.00 | 56.75 | 56.875        | 0.07           | 57.00                           | 53.25 | 61.50 | 57.250        | 1.95           |
| 2-A1B2C2D4  | 42.25                          | 36.00 | 44.00 | 40.750        | 1.98           | 54.50                           | 59.00 | 50.75 | 54.750        | 1.99           |
| 3-A1B3C3D2  | 48.25                          | 43.25 | 43.75 | 45.083        | 1.30           | 60.18                           | 61.55 | 59.40 | 60.375        | 0.51           |
| 4-A1B4C4D3  | 47.75                          | 52.00 | 55.50 | 51.750        | 1.83           | 64.00                           | 70.50 | 73.00 | 69.167        | 2.19           |
| 5-A2B1C2D3  | 48.75                          | 44.00 | 45.25 | 46.000        | 1.16           | 60.25                           | 57.75 | 59.50 | 59.167        | 0.60           |
| 6-A2B2C1D2  | 64.25                          | 69.25 | 74.50 | 69.333        | 2.42           | 78.00                           | 75.00 | 66.75 | 73.250        | 2.75           |
| 7-A2B3C4D4  | 60.25                          | 57.25 | 54.25 | 57.250        | 1.73           | 67.50                           | 72.25 | 62.75 | 67.500        | 2.17           |
| 8-A2B4C3D1  | 56.30                          | 69.75 | 62.75 | 62.750        | 3.18           | 68.50                           | 65.00 | 68.00 | 67.167        | 0.89           |
| 9-A3B1C3D4  | 55.75                          | 50.25 | 62.00 | 56.333        | 2.77           | 68.50                           | 73.75 | 78.00 | 73.417        | 2.24           |
| 10-A3B2C4D1 | 57.75                          | 67.50 | 56.25 | 57.000        | 2.88           | 68.58                           | 64.3  | 73.75 | 68.875        | 2.24           |
| 11-A3B3C1D3 | 57.25                          | 53.50 | 52.25 | 54.333        | 1.23           | 58.50                           | 63.50 | 58.75 | 60.250        | 1.34           |
| 12-A3B4C2D2 | 58.75                          | 56.75 | 59.75 | 58.250        | 0.78           | 67.38                           | 67.25 | 67.50 | 67.375        | 0.07           |
| 13-A4B1C4D2 | 59.75                          | 49.00 | 57.50 | 55.417        | 2.67           | 55.00                           | 54.50 | 62.00 | 57.167        | 1.86           |
| 14-A4B2C3D3 | 53.00                          | 64.25 | 61.75 | 59.667        | 2.78           | 77.00                           | 67.75 | 71.50 | 72.083        | 2.19           |
| 15-A4B3C2D1 | 52.00                          | 62.50 | 61.25 | 61.875        | 2.70           | 65.75                           | 63.75 | 58.75 | 62.750        | 1.73           |
| 16-A4B4C1D4 | 53.50                          | 47.25 | 47.25 | 49.333        | 1.70           | 66.00                           | 58.00 | 60.25 | 61.417        | 1.86           |

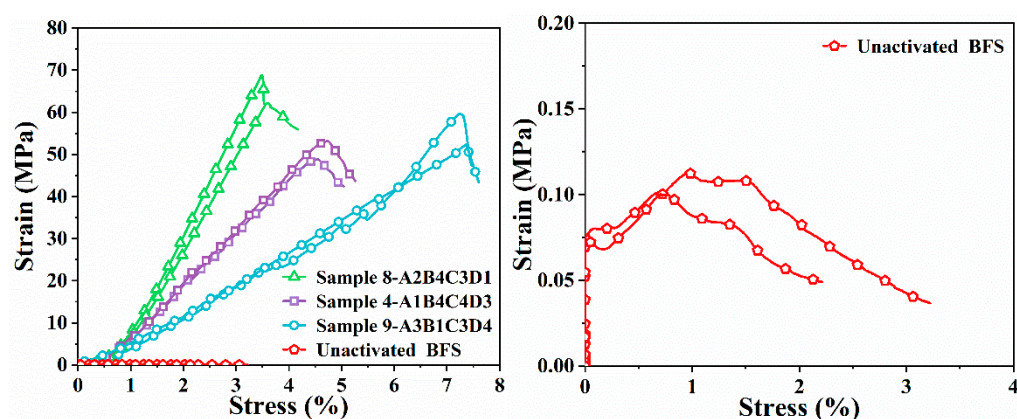

**Figure S1.** The stress-strain curve of two samples in some group.
